# Supplementary material for: IL-19 Contributes to the Development of Nonalcoholic Steatohepatitis by Altering Lipid Metabolism
Source: MDPI journal article supplement (doi:10.3390/cells10123513), 2021-12-13
Supplement: s1 [file s1]

**Supplementary Table S1.** List of specific primers used

| gene          | forward                    | reverse                  | accession number               | product length (bp) |
|---------------|----------------------------|--------------------------|--------------------------------|---------------------|
| Il-19         | CTCCTGGGCATGACGTTGATT      | GCATGGCTCTCTTGATCTCGT    | <a href="#">NM_001009940.2</a> | 118                 |
| Il-6          | CTGCAAGAGACTTCCATCCAG      | AGTGGTATAGACAGGTCTGTTGG  | <a href="#">NM_031168.2</a>    | 131                 |
| TNF- $\alpha$ | CATCTTCTCAAAATTCGAGTGACAA  | TGGGAGTAGACAAGGTACAACCC  | <a href="#">NM_013693.3</a>    | 175                 |
| TGF- $\beta$  | TACAGGGCTTTCGATTACAGC      | CGCACACAGCAGTTCTTCTC     | <a href="#">NM_011577.2</a>    | 247                 |
| ACLY          | TGCTCGATTATGCACTGGAAGT     | ATGAACCCCATACTCCTTCCCAG  | <a href="#">NM_001096</a>      | 202                 |
| ACC1          | GCTCCTTGTCACCTGCTTCT       | CAAGGCCAAGCCATCCTGTA     | <a href="#">NM_198834</a>      | 80                  |
| FASN          | TCGTGGGCTACAGCATGGT        | GCCCTCTGAAGTCGAAGAAGAA   | <a href="#">NM_004104.5</a>    | 78                  |
| SCD1          | TCTAGCTCCTATACCACCACCA     | TCGTCTCCAATTATCTCCTCC    | <a href="#">NM_005063.5</a>    | 82                  |
| SCD5          | ATGTCGTCCTGATGAGCTTG       | CAGGAGGAAGCAGAAGTAGG     | <a href="#">NM_001037582</a>   | 107                 |
| SREBP-1c      | AAACTCAAGCAGGAGAACCTAAGTCT | GTCAGTGTGTCCTCCACCTCAGT  | <a href="#">NM_001005291</a>   | 143                 |
| SREBP-2       | CAGCAGCCTTTGATATACCAGAATG  | AGGATGTCACCAGGCTTTGGAC   | <a href="#">NM_004599</a>      | 79                  |
| CD36          | TCCTTCCTGCAGCCCAATG        | AGCCTCTGTTCCTCACTGATAGTA | <a href="#">NM_000072</a>      | 60                  |
| GAPDH         | ACCCACTCCTCCACCTTTG        | CTCTTGCTCTTGTCTGGG       | <a href="#">NM_001256799.3</a> | 178                 |
| HPRT          | GTTGGATACAGGCCAGACTTTGTTG  | GAGGGTAGGCTGGCCTATAGGCT  | <a href="#">NM_013556.2</a>    | 352                 |
